# Supplementary material for: Obesity, Bone Loss, and Periodontitis: The Interlink
Source: MDPI journal article supplement (doi:10.3390/biom12070865), 2022-06-22
Supplement: s1 [file s1]

## Supplementary information

# Obesity, Bone Loss, and Periodontitis: The Interlink

Pengfei Zhao <sup>1</sup>, Aimin Xu <sup>2</sup> and Wai Keung Leung <sup>1,\*</sup>

<sup>1</sup> Faculty of Dentistry, The University of Hong Kong, Hong Kong SAR, China; pfzhao@connect.hku.hk

<sup>2</sup> Department of Medicine, Li Ka Shing Faculty of Medicine, The University of Hong Kong, Hong Kong SAR, China; amxu@hku.hk

\* Correspondence: ewkleung@hku.hk; Tel.: +852-2859-0417

**Table S1.** Obesity and periodontitis systematic reviews and meta-analyses search strategies.

| Database<br>(Start date) | Search strategies (Search end date: March 31, 2022)                                                                                                                                                                           |
|--------------------------|-------------------------------------------------------------------------------------------------------------------------------------------------------------------------------------------------------------------------------|
| PubMed<br>(1946)         | (((((Obesity [MeSH Terms]) OR (obese)) OR (overweight)) AND (((Periodontitis [MeSH Terms]) OR (Chronic Periodontitis [MeSH Terms])) OR (periodontal disease))) AND (Systematic review OR review OR overview OR meta-analysis) |
| EMBASE<br>(1974)         | (exp "obesity"/ or exp "obese patient"/) AND (exp "periodontitis"/ or exp "chronic periodontitis"/ or exp "periodontal disease"/) AND (exp "review"/ or exp "systematic review"/ or exp "meta analysis"/ or overview.mp.)     |
| Web of Science<br>(1956) | ((TS=(obesity)) OR TS=(obese)) AND (((TS=(periodontitis)) OR TS=(chronic periodontitis)) OR TS=(periodontal disease)) AND (((TS=(review)) OR TS=(systematic review)) OR TS=(meta analysis)) OR TS=(overview))                 |

**Table S2.** Assessment of methodological quality by Risk of Bias in Systematic Reviews (ROBIS) tool concerning systematic reviews and meta-analyses mentioned.

| Authors, year                         | Phase 1             | Phase 2                       |                                            |                                        | Phase 3                   |                            |
|---------------------------------------|---------------------|-------------------------------|--------------------------------------------|----------------------------------------|---------------------------|----------------------------|
|                                       | Assessing relevance | 1. Study eligibility criteria | 2. Identification and selection of studies | 3. Data collection and study appraisal | 4. Synthesis and findings | Risk of bias in the review |
| <i>Periodontitis and obesity</i>      |                     |                               |                                            |                                        |                           |                            |
| Chaffee <i>et al.</i> 2010 [12]       | Yes                 | Low                           | Low                                        | Low                                    | High <sup>1</sup>         | High <sup>1</sup>          |
| Suvan <i>et al.</i> 2011 [13]         | Yes                 | Low                           | Low                                        | Low                                    | Unclear <sup>2</sup>      | Unclear <sup>2</sup>       |
| de Moura-Grec <i>et al.</i> 2014 [14] | Yes                 | Low                           | Low                                        | High <sup>c</sup>                      | Unclear <sup>2</sup>      | High <sup>2,3</sup>        |
| Keller <i>et al.</i> 2015 [20]        | Yes                 | Low                           | Low                                        | High <sup>c</sup>                      | High <sup>4</sup>         | High <sup>3,4</sup>        |
| Li <i>et al.</i> 2015 [15]            | Yes                 | Low                           | Low                                        | Low                                    | Low                       | Low                        |
| Nascimento <i>et al.</i> 2015 [16]    | Yes                 | Low                           | Low                                        | Low                                    | Low                       | Low                        |

|                                                                 |         |     |     |                   |                   |                      |
|-----------------------------------------------------------------|---------|-----|-----|-------------------|-------------------|----------------------|
| Nascimento <i>et al.</i> 2016 [17]                              | Partial | Low | Low | Low               | Low               | Low                  |
| Martens <i>et al.</i> 2017 [18]                                 | Yes     | Low | Low | Low               | High <sup>5</sup> | High <sup>5</sup>    |
| Martinez-Herrera <i>et al.</i> 2017 [21]                        | Yes     | Low | Low | High <sup>3</sup> | High <sup>4</sup> | High <sup>3, 4</sup> |
| Khan <i>et al.</i> 2018 [22]                                    | Yes     | Low | Low | Low               | High <sup>4</sup> | High <sup>4</sup>    |
| Foratori-Junior <i>et al.</i> 2022 [19]                         | Yes     | Low | Low | Low               | Low               | Low                  |
| <b><i>Periodontitis GCF cytokines and obesity</i></b>           |         |     |     |                   |                   |                      |
| Akram <i>et al.</i> 2015 [114]                                  | Yes     | Low | Low | Low               | Low               | Low                  |
| <b><i>Exercise intervention adjunct periodontal therapy</i></b> |         |     |     |                   |                   |                      |
| Gerber <i>et al.</i> 2016 [146]                                 | Yes     | Low | Low | Low               | High <sup>4</sup> | High <sup>4</sup>    |
| Ramseier <i>et al.</i> [154]                                    | Yes     | Low | Low | Low               | High <sup>4</sup> | High <sup>4</sup>    |
| <b><i>Bone mineral density and obesity</i></b>                  |         |     |     |                   |                   |                      |
| Turcotte <i>et al.</i> 2021 [5]                                 | Yes     | Low | Low | Low               | Low               | Low                  |

<sup>1</sup> Heterogeneity of included studies is considerable with 13 of 28 primary studies rated with high risk of bias and were not addressed in the synthesis.

<sup>2</sup> Robustness of the findings is not secured because funnel plot or sensitivity analyses were not attempted.

<sup>3</sup> Risk of bias (or methodological quality) not assessed using appropriate criteria.

<sup>4</sup> ROBIS Domain 4.4, 4.5, and 4.6 were not addressed in the systematic review concern without meta-analysis (i.e. between study variation-heterogeneity, funnel plot/sensitivity analysis, bias — publication bias data not available).

<sup>5</sup> 6 of 7 included studies did not report periodontal disease definition, the synthesis may not appropriately reflect any similarity in outcomes while potential heterogeneity was considerable and not addressed.
